# Supplementary material for: A greatly improved procedure for the synthesis of an antibiotic-drug candidate 2,4-diacetylphloroglucinol over silica sulphuric acid catalyst: multivariate optimisation and environmental assessment protocol comparison by metrics
Source: Royal Society of Chemistry journal article supplement (doi:10.1039/d0ra05424k), 2020-01-01
Supplement: d0ra05424k1.pdf [file d0ra05424k1.pdf]

# **ELECTRONIC SUPPLEMENTARY INFORMATIONS**

## **TABLE OF CONTENTS**

|                                                    |             |
|----------------------------------------------------|-------------|
| Representation of improved synthesis of DAPG       | <b>(S1)</b> |
| Characterisation Data of Catalyst                  | <b>(S2)</b> |
| <sup>1</sup> H NMR and <sup>13</sup> C NMR Spectra | <b>(S3)</b> |
| EATOS Results                                      | <b>(S4)</b> |
| Andraos Results                                    | <b>(S5)</b> |
| Energy Requirements Calculation Results            | <b>(S6)</b> |
| References                                         | <b>(S7)</b> |

# REPRESENTATION OF IMPROVED SYNTHESIS OF DAPG (S1)

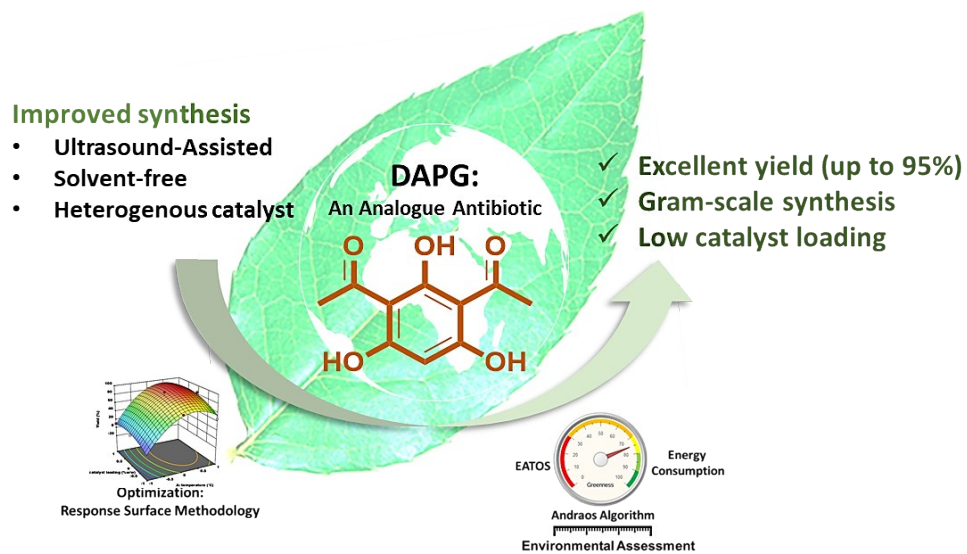

FIGURE S1. Representation of improved synthesis of DAPG

## CHARACTERISATION DATA OF CATALYST (S2)

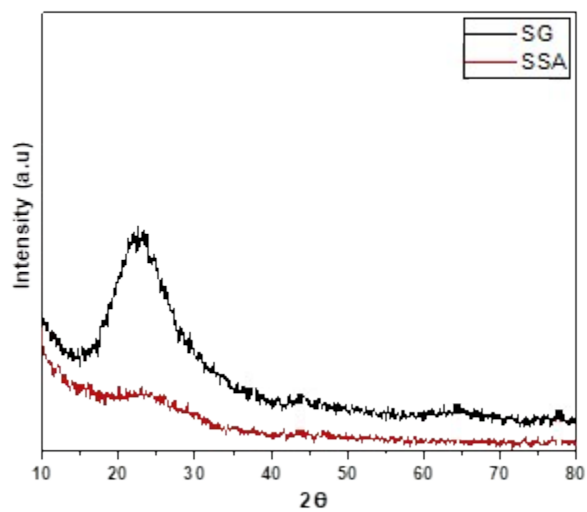

**FIGURE S2.** XRD spectra of silica gel (SG) and silica sulphuric acid (SSA)

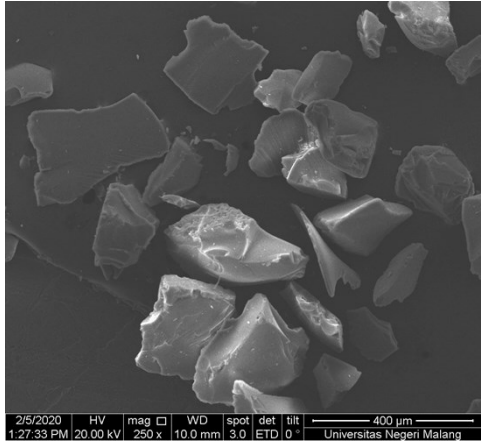

**A**

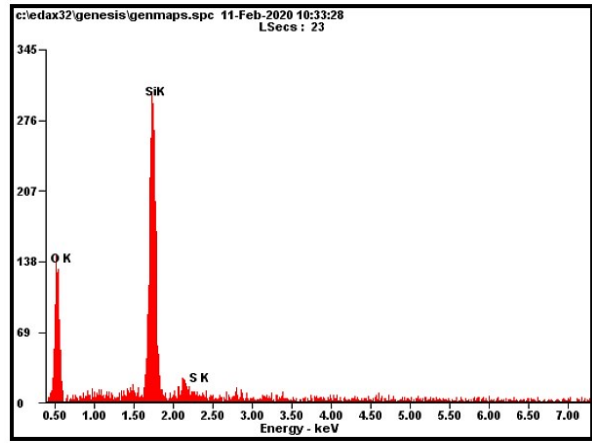

**B**

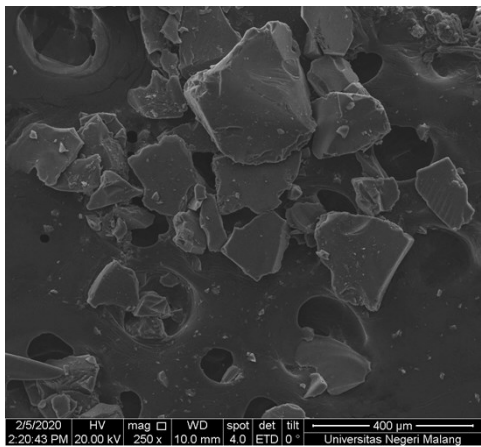

**C**

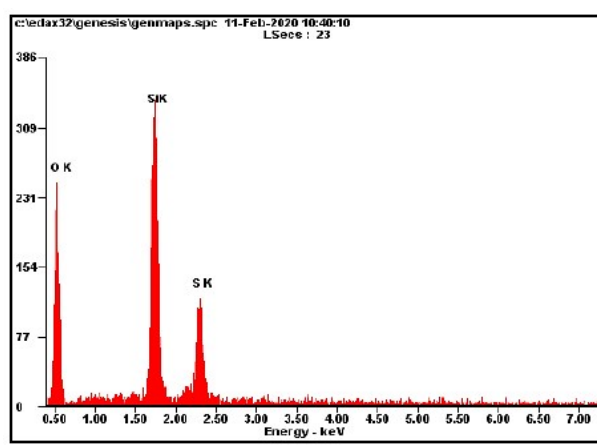

**D**

**FIGURE S3.** (a) SEM image of silica gel (SG), (b) EDS spectrum of silica gel (SG), (c) SEM image of silica sulphuric acid (SSA), (d) EDS spectrum of silica gel (SG)

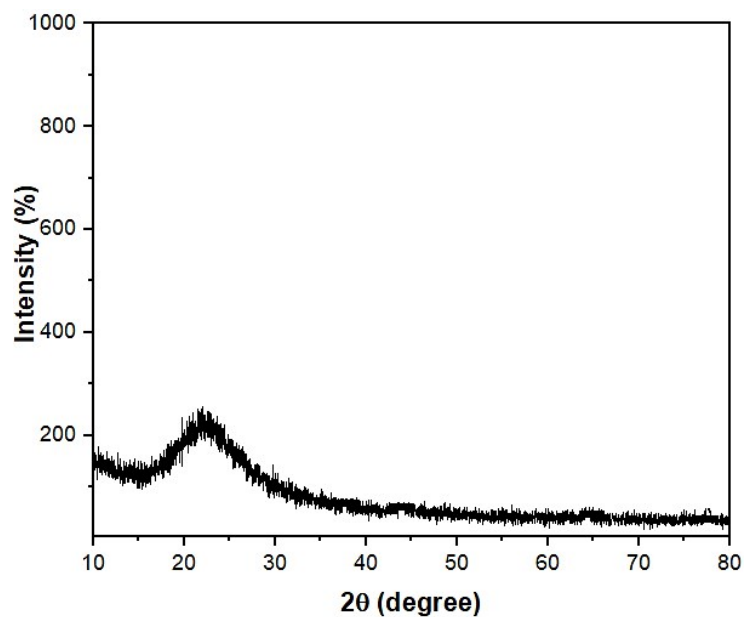

**Figure S4.** XRD spectra of recycle silica sulphuric acid (rSSA)

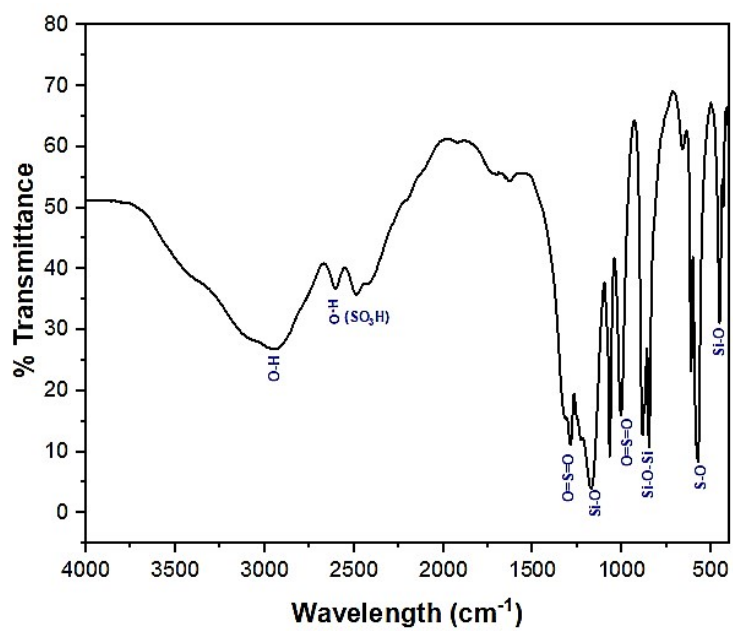

**Figure S5.** FTIR spectra of recycle silica sulphuric acid (rSSA)

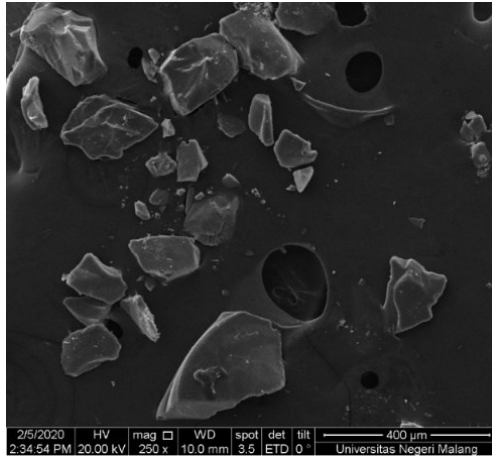

**Figure S6.** SEM image of recycle silica sulphuric acid (rSSA)

## $^1\text{H}$ NMR AND $^{13}\text{C}$ NMR SPECTRA (S3)

**1-(2,4,6-trihydroxyphenyl)ethan-1-one (6a).**  $^1\text{H}$  NMR ( $\text{CD}_3\text{Cl}_3$ , 500 MHz)  $\delta$  ppm: 6.01 (s, 1H, 2 x ArH), 2.70 (s, 3H,  $\text{CH}_3$ ).  $^{13}\text{C}$  NMR ( $\text{CD}_3\text{Cl}_3$ , 125 MHz)  $\delta$  ppm: 203.58, 165.32, 107.01, 95.81, 32.21. The data of  $^1\text{H}$  NMR and  $^{13}\text{C}$  NMR were agreed with the literature values<sup>1</sup>.

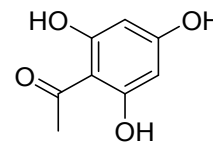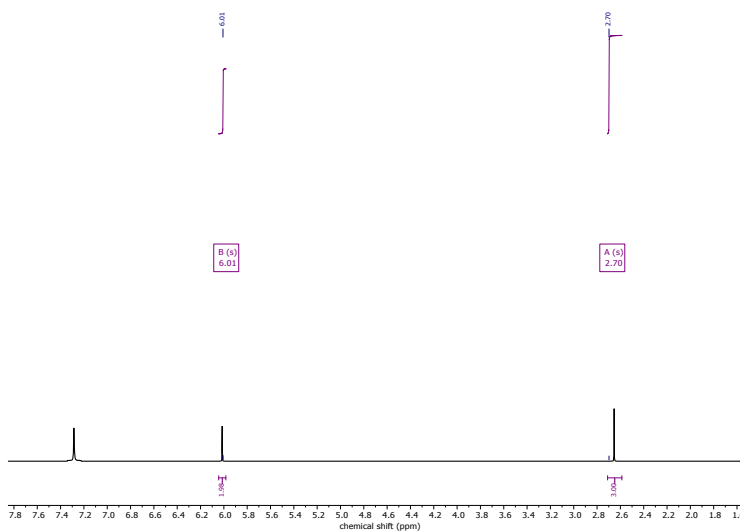

$^1\text{H}$  NMR spectrum of 1-(2,4,6-trihydroxyphenyl)ethan-1-one

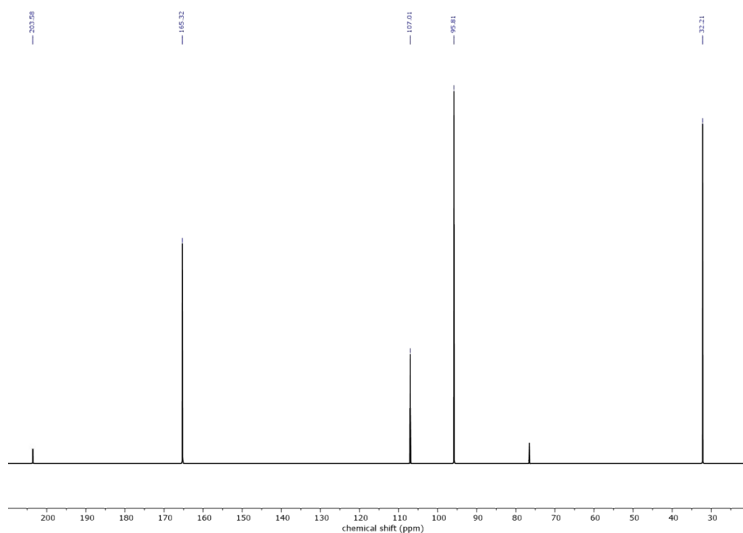

$^{13}\text{C}$  NMR spectrum of 1-(2,4,6-trihydroxyphenyl)ethan-1-one

**1,1'-(2,4,6-trihydroxy-1,3-phenylene)bis(ethan-1-one) (3).**  $^1\text{H}$  NMR ( $\text{CD}_3\text{Cl}_3$ , 500 MHz)  $\delta$  ppm: 6.20 (s, 1H, ArH), 2.63 (s, 6H, 2 x  $\text{CH}_3$ ).  $^{13}\text{C}$  NMR ( $\text{CD}_3\text{Cl}_3$ , 125 MHz)  $\delta$  ppm: 205.56, 173.56, 170.65, 104.83, 98.63, 33.23. The data of  $^1\text{H}$  NMR and  $^{13}\text{C}$  NMR were agreed with the literature values<sup>1</sup>.

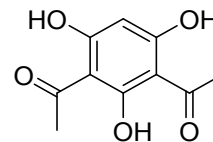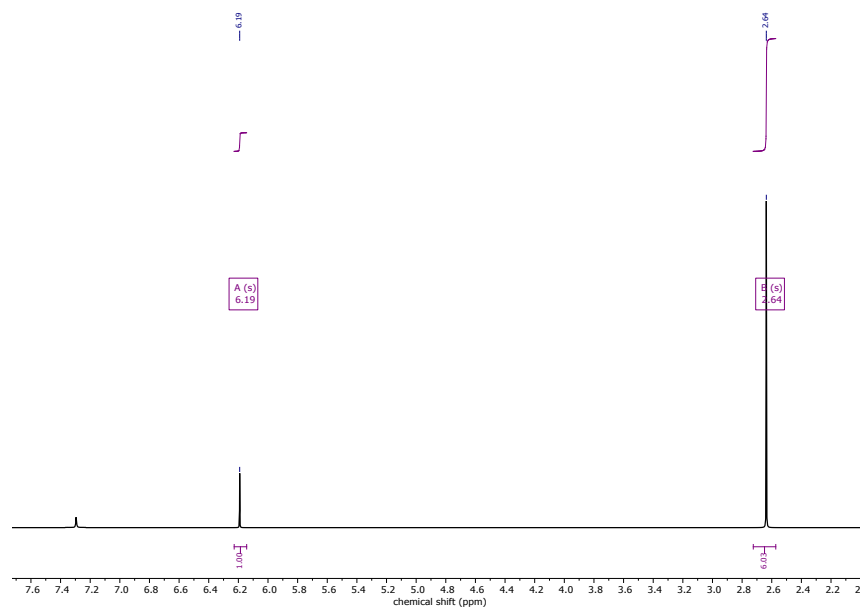

$^1\text{H}$  NMR spectrum of 1,1'-(2,4,6-trihydroxy-1,3-phenylene)bis(ethan-1-one)

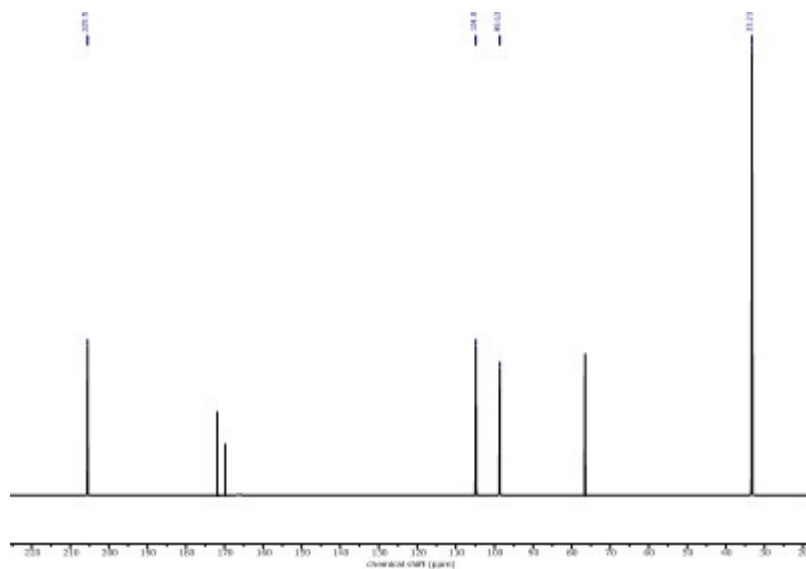

$^{13}\text{C}$  NMR spectrum of 1,1'-(2,4,6-trihydroxy-1,3-phenylene)bis(ethan-1-one)



**2-methyl-1-(2,4,6-trihydroxyphenyl)propan-1-one (6b).**  $^1\text{H}$  NMR ( $\text{CD}_3\text{Cl}_3$ , 500 MHz)  $\delta$  ppm: 5.84 (s, 2H, 2 x ArH), 3.84 (p,  $J = 5.4$  Hz, 1H,  $-\text{CH}(\text{CH}_3)_2$ ), 1.15 (d,  $J = 5.5$  Hz, 6H, 2 x  $\text{CH}_3$ ).  $^{13}\text{C}$  NMR ( $\text{CD}_3\text{Cl}_3$ , 125 MHz)  $\delta$  ppm: 211.02, 172.70, 170.29, 105.74, 96.12, 39.58, 19.53.

The data of  $^1\text{H}$  NMR and  $^{13}\text{C}$  NMR were agreed with the literature values<sup>2-4</sup>.

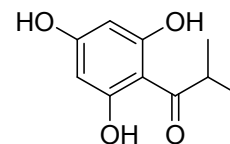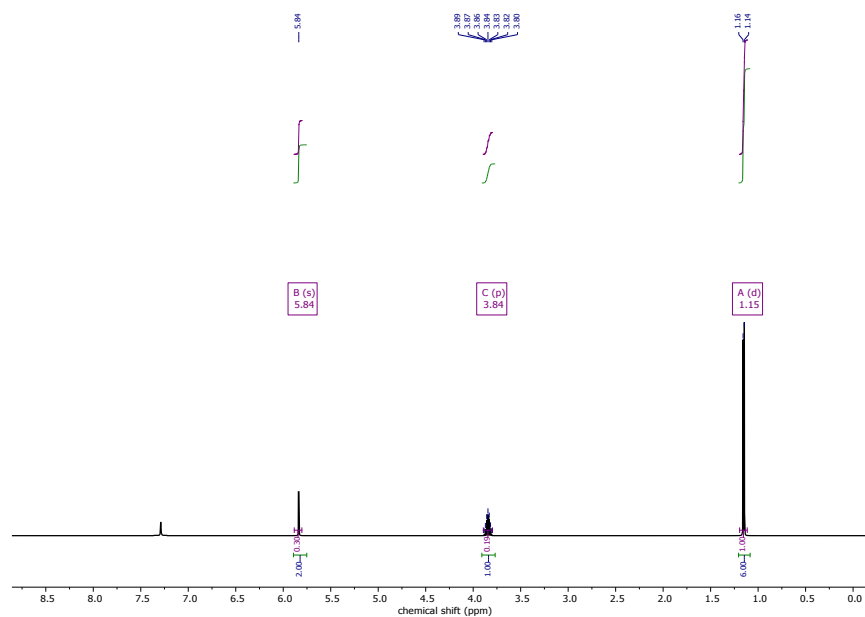

$^1\text{H}$  NMR spectrum of 2-methyl-1-(2,4,6-trihydroxyphenyl)propan-1-one

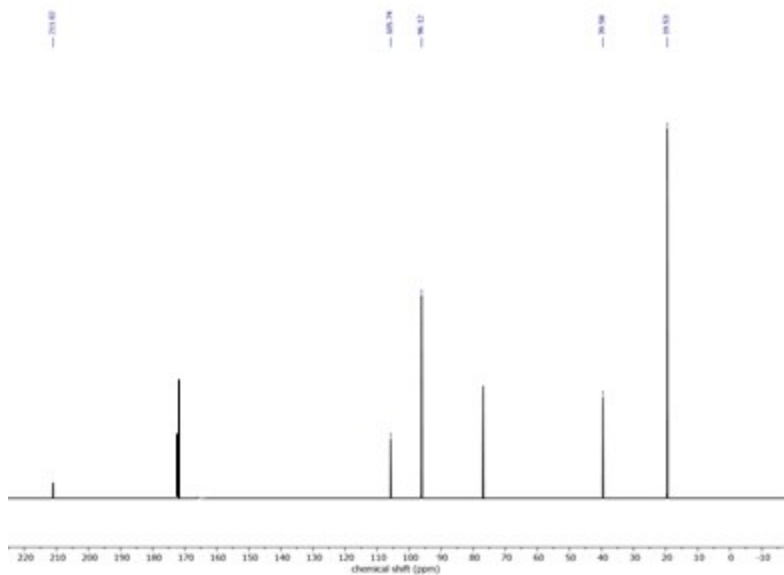

$^{13}\text{C}$  NMR spectrum of 2-methyl-1-(2,4,6-trihydroxyphenyl)propan-1-one

**1,1'-(2,4,6-trihydroxy-1,3-phenylene)bis(2-methylpropan-1-one) (5a).**

$^1\text{H}$  NMR ( $\text{CD}_3\text{Cl}_3$ , 500 MHz)  $\delta$  ppm: 6.19 (s, 1H, ArH), 3.52 (p,  $J = 5.4$  Hz, 2H, 2 x  $-\text{CH}(\text{CH}_3)_2$ ), 1.15 (d,  $J = 5.4$  Hz, 12H, 4 x  $\text{CH}_3$ ).  $^{13}\text{C}$  NMR ( $\text{CD}_3\text{Cl}_3$ , 500 125)  $\delta$  ppm:  $\delta$  212.07, 170, 168, 104.21, 98.97, 39.59, 19.21. The data of  $^1\text{H}$  NMR and  $^{13}\text{C}$  NMR were agreed with the literature values<sup>2</sup>.

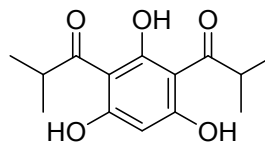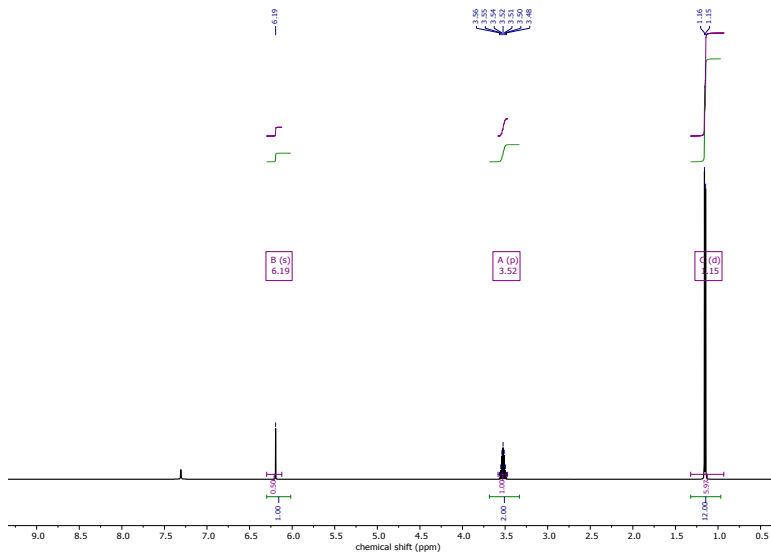

**$^1\text{H}$  NMR spectrum of 1,1'-(2,4,6-trihydroxy-1,3-phenylene)bis(2-methylpropan-1-one)**

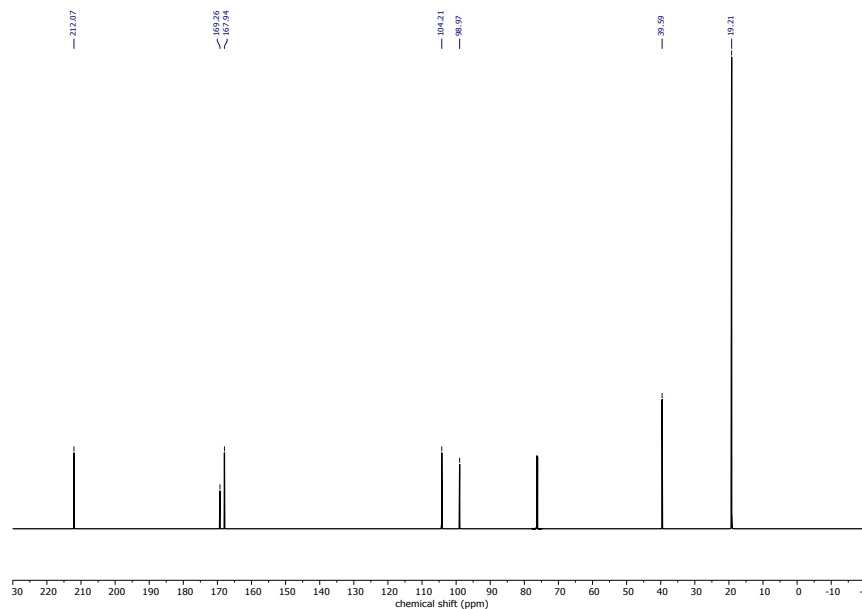

**$^{13}\text{C}$  NMR spectrum of 1,1'-(2,4,6-trihydroxy-1,3-phenylene)bis(2-methylpropan-1-one)**

**3-methyl-1-(2,4,6-trihydroxyphenyl)butan-1-one (6c).**  $^1\text{H}$  NMR ( $\text{CD}_3\text{Cl}_3$ , 500 MHz)  $\delta$  ppm: 5.83 (s, 2H, 2 x ArH), 2.83 (d, 2H,  $-\text{CH}_2-\text{CH}<$ ), 2.25 (dt,  $J = 11.0, 5.5$  Hz, 1H,  $-\text{CH}(\text{CH}_3)_2$ ), 0.95 (d,  $J = 5.4$  Hz, 12H, 4x  $\text{CH}_3$ ).  $^{13}\text{C}$  NMR ( $\text{CD}_3\text{Cl}_3$ , 125 MHz)  $\delta$  ppm: 206.16, 164.5, 165.7, 105.78, 96.11, 52.89, 25.53, 22.77. The data of  $^1\text{H}$  NMR and  $^{13}\text{C}$  NMR were agreed with the literature values<sup>2</sup>.

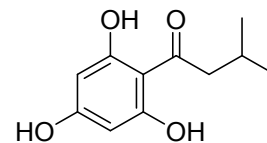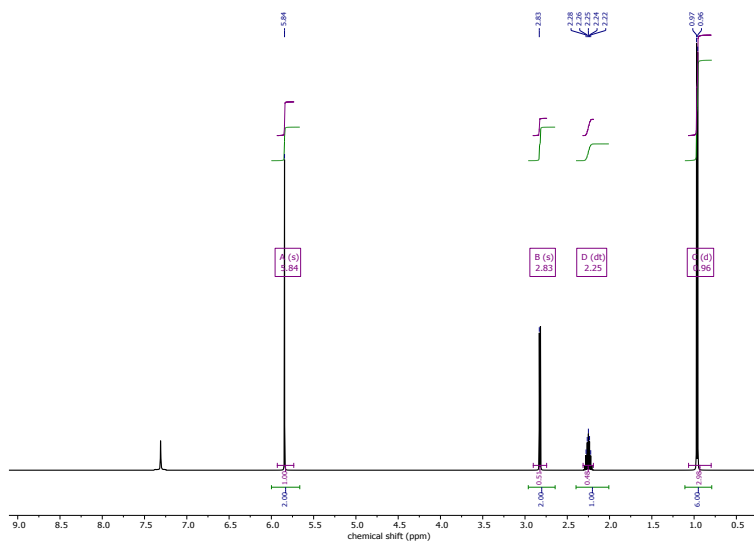

$^1\text{H}$  NMR spectrum of 3-methyl-1-(2,4,6-trihydroxyphenyl)butan-1-one

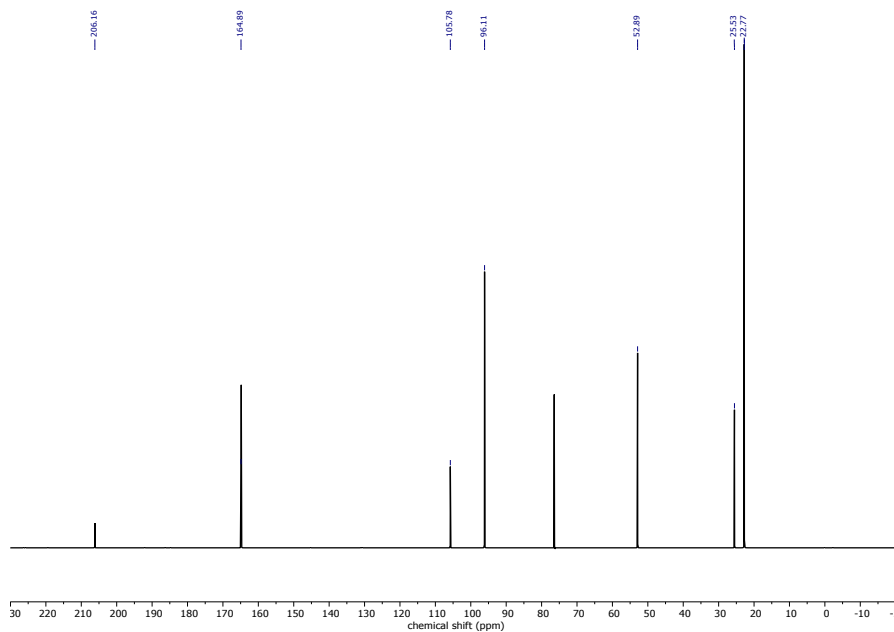

$^{13}\text{C}$  NMR spectrum of 3-methyl-1-(2,4,6-trihydroxyphenyl)butan-1-one

**1,1'-(2,4,6-trihydroxy-1,3-phenylene)bis(3-methylbutan-1-one) (5b).**

$^1\text{H}$  NMR ( $\text{CD}_3\text{Cl}_3$ , 500 MHz)  $\delta$  ppm: : 6.20 (s, 1H, ArH), 2.9 (d,  $J = 5.6$  Hz, 4H, 2 x  $-\text{CH}_2-\text{CH}(\text{CH}_3)_2$ ), 2.26 (dh,  $J = 11.0, 5.5$  Hz, 2H, 2 x  $\text{CH}_2-\text{CH}(\text{CH}_3)_2$ ), 0.97 (d,  $J = 5.4$  Hz, 12H, 4x  $\text{CH}_3$ ).  $^{13}\text{C}$  NMR ( $\text{CD}_3\text{Cl}_3$ , 125 MHz)  $\delta$  ppm: 205.98, 167.07, 103.73, 99.19, 53.09, 24.94, 22.81. The data of  $^1\text{H}$  NMR and  $^{13}\text{C}$  NMR were agreed with the literature values<sup>2</sup>.

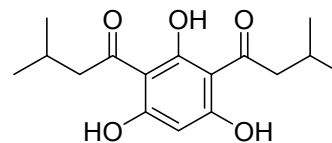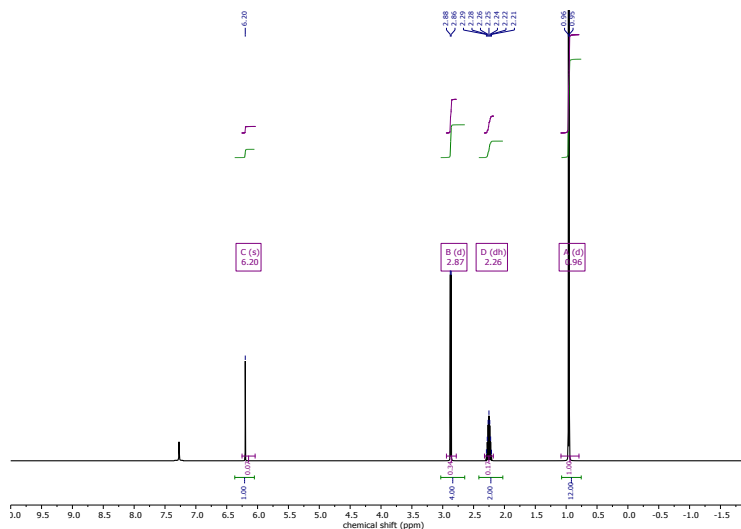

**$^1\text{H}$  NMR spectrum of 1,1'-(2,4,6-trihydroxy-1,3-phenylene)bis(3-methylbutan-1-one)**

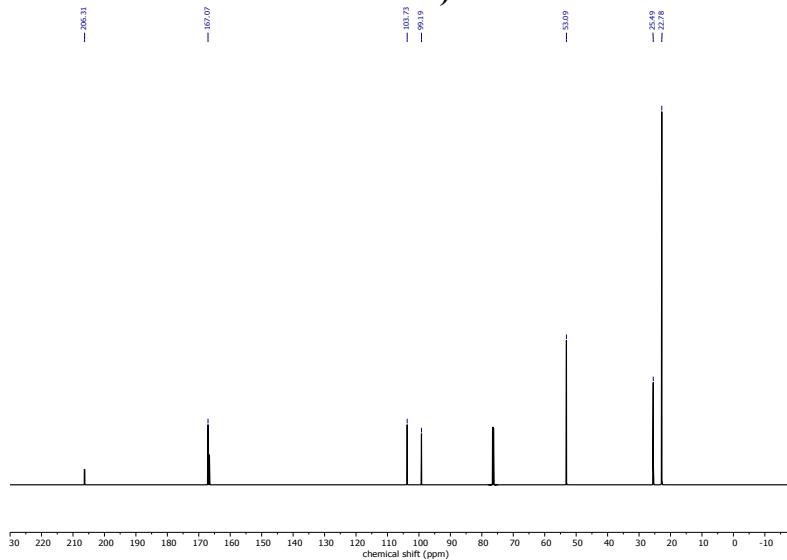

**$^{13}\text{C}$  NMR spectrum of 1,1'-(2,4,6-trihydroxy-1,3-phenylene)bis(3-methylbutan-1-one)**

**1-(3-acetyl-2,4,6-trihydroxyphenyl)-2-methylpropan-1-one (7a).**  $^1\text{H}$  NMR ( $\text{CD}_3\text{Cl}_3$ , 500 MHz)  $\delta$  ppm: 6.21(s, 1H, ArH), 3.57 – 3.47 (m, 1H,  $-\text{CH}(\text{CH}_3)_2$ ), 2.64 (s, 3H,  $\text{CH}_3$ ), 1.15 (d,  $J = 5.4$  Hz, 6H, 2 x  $\text{CH}_3$ ).  $^{13}\text{C}$  NMR ( $\text{CD}_3\text{Cl}_3$ , 125 MHz)  $\delta$  ppm: 212.20, 205.45, 167.51, 166.80, 104.89, 99.18, 39.65, 33.23, 19.26.

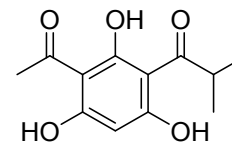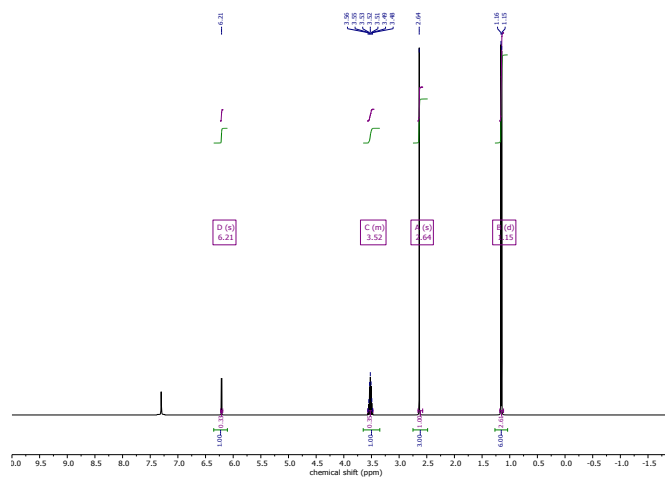

$^1\text{H}$  NMR spectrum of 1-(3-acetyl-2,4,6-trihydroxyphenyl)-2-methylpropan-1-one

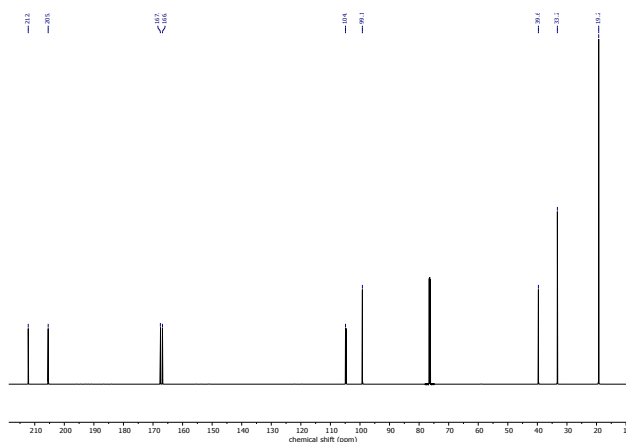

$^{13}\text{C}$  NMR spectrum of 1-(3-acetyl-2,4,6-trihydroxyphenyl)-2-methylpropan-1-one

**1-(3-acetyl-2,4,6-trihydroxyphenyl)-3-methylbutan-1-one (7b).**  $^1\text{H}$  NMR ( $\text{CD}_3\text{Cl}_3$ , 500 MHz)  $\delta$  ppm: 6.2 (s, 1H, ArH), 2.87 (d,  $J = 5.6$  Hz,  $-\text{CH}_2-\text{CH}(\text{CH}_3)_2$ ), 2.64(s, 3H,  $\text{CH}_3$ ), 2.25 (dt,  $J = 11.0, 5.5$  Hz, 1H,  $\text{CH}_2-\text{CH}(\text{CH}_3)_2$ ), 0.96 (d,  $J = 5.5$  Hz, 6H, 2 x  $\text{CH}_3$ ).  $^{13}\text{C}$  NMR ( $\text{CD}_3\text{Cl}_3$ , 125 MHz)  $\delta$  ppm: 206.66, 205.44, 166.73, 166.11, 104.52,

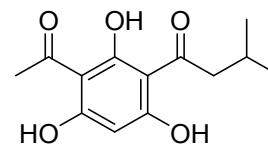



## EATOS RESULTS (S4)

**Table S1. S<sup>-1</sup>, EI<sub>in</sub>, E, and EI<sub>out</sub> measured for synthesis A**

| Synthesis A      | S <sup>-1</sup> | EI <sub>in</sub> | E    | EI <sub>out</sub> |
|------------------|-----------------|------------------|------|-------------------|
| Total            | 3.43            | 13.71            | 2.43 | 5.72              |
| Catalyst         |                 |                  |      |                   |
| MSA              | 1.46            | 5.84             | 1.46 | 1.46              |
| Substrates       |                 |                  |      |                   |
| Phloroglucinol   | 0.64            | 3.19             |      |                   |
| Acetic anhydride | 1.03            | 3.617            |      | 1.37              |
| By-products      |                 |                  |      |                   |
| Coupled products |                 |                  |      |                   |
| Acetic acid      |                 |                  | 0.57 | 2.57              |

**Table S2. S<sup>-1</sup>, EI<sub>in</sub>, E, and EI<sub>out</sub> measured for synthesis B**

| Synthesis B       | S <sup>-1</sup> | EI <sub>in</sub> | E     | EI <sub>out</sub> |
|-------------------|-----------------|------------------|-------|-------------------|
| Total             | 108             | 419.86           | 107   | 16.6              |
| Solvent           |                 |                  |       |                   |
| dioxane           | 89.10           | 356.39           | 89.10 | 89.10             |
| Catalyst          |                 |                  |       |                   |
| Boron trifluoride | 9               | 35.93            | 9     | 9                 |
| Substrates        |                 |                  |       |                   |
| Phloroglucinol    | 1.1             | 5.45             |       |                   |
| Acetic anhydride  | 8.8             | 22.08            | 7.06  | 31.79             |
| By-products       |                 |                  | 1.29  | 4.07              |
| Coupled products  |                 |                  |       |                   |
| Acetic acid       |                 |                  | 0.57  | 2.57              |



**Table S3. S<sup>-1</sup>, EI<sub>in</sub>, E, and EI<sub>out</sub> measured for synthesis C**

| Synthesis A      | S <sup>-1</sup> | EI <sub>in</sub> | E     | EI <sub>out</sub> |
|------------------|-----------------|------------------|-------|-------------------|
| Total            | 12.14           | 22.87            | 11.14 | 16.6              |
| Catalyst         |                 |                  |       |                   |
| MSA              | 9.22            | 9.22             | 9.22  | 9.22              |
| Substrates       |                 |                  |       |                   |
| Phloroglucinol   | 0.97            | 4.83             |       |                   |
| Acetic anhydride | 1.96            | 8.81             | 0.39  | 1.76              |
| By-products      |                 |                  | 0.96  | 3.05              |
| Coupled products |                 |                  |       |                   |
| Acetic acid      |                 |                  | 0.57  | 2.57              |

**Table S4.  $S^{-1}$ ,  $EI_{in}$ ,  $E$ , and  $EI_{out}$  measured for synthesis D**

| Synthesis A      | $S^{-1}$ | $EI_{in}$ | $E$  | $EI_{out}$ |
|------------------|----------|-----------|------|------------|
| Total            | 3.43     | 5.6       | 0.76 | 2.57       |
| Catalyst         |          |           |      |            |
| NHZMOR           | 1.46     | 0.1       | 0.1  | 0.1        |
| Substrates       |          |           |      |            |
| Phloroglucinol   | 0.64     | 1.9       |      | 0.04       |
| Acetic anhydride | 1.03     | 3.6       |      |            |
| By-products      |          |           | 0.08 | 0.45       |
| Coupled products |          |           |      |            |
| MAPG             |          |           | 0.4  | 1.8        |
| Water            |          |           | 0.18 | 0.17       |

**Table S5. S<sup>-1</sup>, EI<sub>in</sub>, E, and EI<sub>out</sub> measured for synthesis E**

| Synthesis A      | S <sup>-1</sup> | EI <sub>in</sub> | E     | EI <sub>out</sub> |
|------------------|-----------------|------------------|-------|-------------------|
| Total            | 3.43            | 5.25             | 0.61  | 2.05              |
| Catalyst         |                 |                  |       |                   |
| SSA              | 1.46            | 0.03             | 0.03  | 0.03              |
| Substrates       |                 |                  |       |                   |
| Phloroglucinol   | 0.64            | 1.8              | 0.006 | 0.04              |
| Acetic anhydride | 1.03            | 3.4              |       | 1.37              |
| By-products      |                 |                  |       |                   |
| Coupled products |                 |                  |       |                   |
| MAPG             |                 |                  | 0.4   | 1.8               |
| water            |                 |                  | 0.17  | 0.17              |

## ANDRAOS ALGORITHM RESULTS (S5)

**Table S6.** Comparison of Raw Material Footprint for Syntheses A–E According to the Andraos Algorithm

|              | <b>A</b> | <b>B</b> | <b>C</b> | <b>D</b> | <b>Present</b> |
|--------------|----------|----------|----------|----------|----------------|
| <b>AE</b>    | 0.424    | 0.182    | 0.633    | 0.633    | 0.633          |
| <b>Rxn</b>   | 0.881    | 0.300    | 0.600    | 0.942    | 0.947          |
| <b>Yield</b> |          |          |          |          |                |
| <b>1/SF</b>  | 0.391    | 0.111    | 0.617    | 0.617    | 0.617          |
| <b>MRP</b>   | 0.904    | 0.207    | 0.053    | 0.867    | 1.000          |
| <b>RME</b>   | 0.132    | 0.001    | 0.012    | 0.319    | 0.370          |

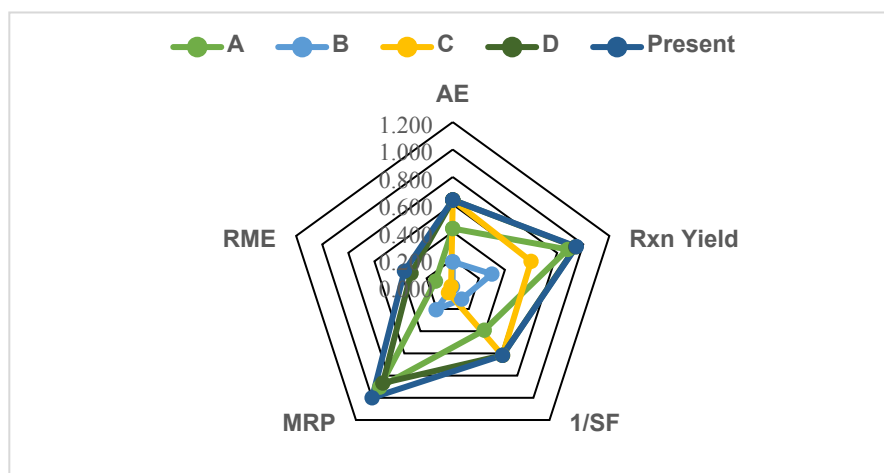

**Figure S7.** Comparison of the raw material footprint for synthetic routes A, B, C, D and E to

DAPG

## ENERGY CALCULATION RESULTS (S6)

**Table S7.** Comparison of the energy consumed by oil bath ( $\Delta$ ), microwave (MW) and ultrasound (US) heating for the Friedel-Crafts acylation between phloroglucinol and acetic anhydride.

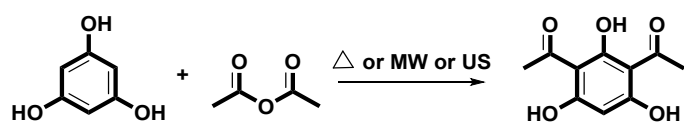

| Entry | Heating method | mmol | Yield (%) | P (kW) | t (h) | E (kWh) | E (kWh/mol) |
|-------|----------------|------|-----------|--------|-------|---------|-------------|
| A     | MW             | 1    | 88        | 0.7    | 0.02  | 0.01    | 13.26       |
| B     | Oil bath       | 1    | 30        | 1.44   | 0.5   | 0.72    | 2400        |
| C     | Oil bath       | 2.5  | 60        | 1.44   | 2     | 2.88    | 12000       |
| D     | Oil bath       | 1    | 95        | 1.44   | 0.5   | 0.72    | 757.89      |
| E     | US             | 1    | 95        | 0.16   | 0.33  | 0.05    | 56.14       |

## REFERENCES (S7)

1. Marchand, P. A., Weller, D. M. & Bonsall, R. F. Convenient synthesis of 2,4-diacetylphloroglucinol a natural antibiotic involved in the control of take-all disease of wheat. *J. Agric. Food Chem.* **48**, 1882–1887 (2000).
2. Meepagala, K. M. & Schrader, K. K. Antibacterial Activity of Acylglucinol Derivatives against *Flavobacterium columnare*. 89–95 (2014).
3. Ng, C. H. *et al.* Synthesis and docking studies of 2,4,6-trihydroxy-3-geranylacetophenone analogs as potential lipoxygenase inhibitor. *Molecules* **19**, 11645–11659 (2014).
4. George, J. H., Hesse, M. D., Baldwin, J. E. & Adlington, R. M. Biomimetic synthesis of polycyclic polyprenylated acylphloroglucinol natural products isolated from *hypericum papuanum*. *Org. Lett.* **12**, 3532–3535 (2010).
